# Supplementary material
Source: PubMed Central journal article supplement (PMC6039659)
Supplement: ba011643-suppl1.pdf [file ba011643-suppl1.pdf]

## Supplemental Data

### Methods

#### Immunofluorescence confocal microscopy

Immunofluorescence confocal microscopy was used to assess the influence c.[2365A>G;2385T>C] genotype on intracellular localization and pseudo-Weibel-Palade body formation. Briefly, HEK293 cells were transiently transfected with equimolar concentrations of wild-type or c.[2365A>G;2385T>C] VWF expression plasmid using Lipofectamine™ (Thermo Fisher Scientific, Carlsbad, CA, USA) according to manufacturer's protocols. Post-transfection (24 h) cells were fixed using BD Cytofix/Cytoperm™ (BD Biosciences, Mississauga, ON, Canada), permeabilized using 0.1% Triton X-100 and blocked using Protein Block (Dako, Glostrup, Denmark). Cells were stained with an anti-VWF antibody (A0082; Dako), DAPI and Alexa Fluor® 647 phalloidin (Thermo Fisher). Slides were imaged using a Leica SP8 laser scanning confocal microscope using a 63X oil immersion objective (Leica Microsystems Inc., Concord, ON, Canada).

#### RNA splicing assays

Two different *in vitro* minigene splicing assays were utilized to investigate RNA splicing. The pET01 Exontrap plasmid (MoBiTec GmbH, Goettingen, Germany) was used to investigate any influence on acceptor / donor splice sites. Wild-type (WT) VWF DNA for exon 18 and ~300 bp flanking intronic sequence was inserted into pET01 via restriction enzyme-mediated cloning. Site-directed mutagenesis was used to generate pET01 plasmids encoding c.2365A>G, c.2385T>C and c.[2365A>G;2385T>C]. An exonic splice enhancer (ESE)-dependent splicing assay<sup>1</sup> utilizing the pcDNA-Dup (SF2-ASF3x) plasmid (kindly provided by Dr. Pascaline Gaildrat, University of Rouen, France) was used to investigate any influence on ESE motifs. Oligonucleotides containing SNV alleles of interest (reference and non-reference) and 15 bp flanking DNA sequence (details available on request) were inserted within the middle exon of pcDNA-Dup via restriction enzyme-mediated cloning. Plasmids containing a functional SF2/ASF ESE or a region of intronic DNA with no predicted ESE motif were used as positive and negative controls respectively. Generated pET01 or pcDNA-Dup plasmids were transfected into HEK293T cells, mRNA was isolated and reverse transcribed to cDNA. Agarose gel electrophoresis was used to separate specific cDNA products.

### **VWF:FVIII analysis**

The ability of recombinant VWF secreted by HEK293T cells to bind FVIII was evaluated using an ELISA as previously described, but with minor modifications.<sup>2,3</sup> Briefly, 10 mU/well of recombinant VWF concentrated by centrifugation (Centricon Plus-70 Centrifugal Filter, 100 kDa pore size; Millipore (Canada) Ltd., Etobicoke, ON) was captured on a 96 well plate coated with an anti-VWF antibody (A0082; Dako, Glostrup, Denmark) and 0.06-2.0 IU/mL recombinant FVIII (ADVATE, Baxter, Deerfield, IL, USA) and incubated for 1 h at 37°C in 10 mM calcium-containing buffer. Bound FVIII was measured with a HRP-conjugated anti-human FVIII antibody (F8C-EIA-D; Affinity Biologicals Inc., Ancaster, ON, Canada). Binding plots were fitted with a one-site binding model (hyperbola) and apparent dissociation rate constant values ( $K_d^{app}$ ) were obtained. The best-fit  $K_d^{app}$  values of VWF SNV were statistically compared to that of WT VWF using an *F*-test.

In order to evaluate precise binding kinetics, WT and p.[T789A;Y795=] VWF were purified with immunoaffinity chromatography using monoclonal antibody CLB-RAg20 and a CNBr sepharose 4B column (performed by Jesse Lai with support from Dr. Jan Voorberg, Department of Plasma Proteins, Sanquin Research, Amsterdam, The Netherlands).<sup>4</sup> A surface plasmon resonance (SPR) assay (using a Biacore 3000; GE Healthcare Bio-Sciences, Pittsburgh, PA, USA) was then performed on purified VWF as previously described.<sup>5</sup> Briefly, purified VWF was covalently immobilized on a C1 sensor chip at a coupling density of 2.0 ng/mm<sup>3</sup> and FVIII (0.313-10 nM; ADVATE) was injected at a rate of 10 µl/min for 4 min (association phase) and flown-out with buffer for 4 min (dissociation phase). The chip surface was regenerated with 4 M MgCl<sub>2</sub>, 1 M NaCl solution. Binding to the surface of the control uncoated flow cell was subtracted from binding to VWF-coated flow cells. Measurements were performed at 37°C. BIAevaluation v2.1 (GE Healthcare) was used to estimate kinetic rate constants and to perform nonlinear regression analysis to determine the rate constants for association ( $k_a$ ) and dissociation ( $k_d$ ). Dissociation constants (KD) were calculated as  $k_d/k_a$ .

**Table S1. Predicted *in silico* effect of SNV on protein and RNA**

|                             | Prediction tool                | c.2365A>G                                        | c.2385T>C                                                                     |
|-----------------------------|--------------------------------|--------------------------------------------------|-------------------------------------------------------------------------------|
| <b>Protein predictions</b>  | Mutation Taster <sup>6</sup>   | Polymorphism                                     | NA                                                                            |
|                             | PolyPhen-2 <sup>7</sup>        | Benign                                           | NA                                                                            |
|                             | PON-P2 <sup>8</sup>            | Neutral                                          | NA                                                                            |
|                             | PROVEAN <sup>9</sup>           | Neutral                                          | NA                                                                            |
|                             | SIFT <sup>10</sup>             | Tolerated                                        | NA                                                                            |
| <b>RNA predictions</b>      | CentroidFold <sup>11</sup>     | Alters secondary structure                       | Alters secondary structure                                                    |
|                             | miRBase <sup>12,13</sup>       | No effect                                        | No effect                                                                     |
| <b>Splicing predictions</b> | ESEfinder <sup>*,14</sup>      | No effect                                        | Creates SRp55 motif, weakens SC35 motif                                       |
|                             | HSF <sup>15</sup>              | Creates ESS motif, cryptic donor activation      | No effect                                                                     |
|                             | NetGene2 <sup>†,16</sup>       | Cryptic donor activation                         | No effect                                                                     |
|                             | Neural Network <sup>†,17</sup> | No effect                                        | No effect                                                                     |
|                             | RESCUE-ESE <sup>*,18</sup>     | No effect                                        | Creates ESE motif                                                             |
|                             | SplicePort <sup>†,19</sup>     | Cryptic donor activation, weakens existing donor | Cryptic acceptor activation, cryptic donor activation, weakens existing donor |

ESE, exonic splice enhancer; ESS, exonic splice silencer; NA, not applicable. \*ESE / ESS predictions only; †acceptor / donor predictions only.

**Table S2. Influence of SNV on VWF:FVIIIIB**

| Expressed<br>VWF | VWF:FVIIIIB*           |                      | VWF:FVIIIIB†          |         |
|------------------|------------------------|----------------------|-----------------------|---------|
|                  | Kd <sup>app</sup> (nM) | ka x 10 <sup>6</sup> | kd x 10 <sup>-3</sup> | KD (nM) |
| Wild-type        | 0.10 ± 0.01            | 2.98 ± 0.015         | 1.63 ± 0.019          | 0.545   |
| p.T789A          | 0.12 ± 0.01            | nd                   | nd                    | nd      |
| p.Y795=          | 0.11 ± 0.01            | nd                   | nd                    | nd      |
| p.[T789A;Y795=]  | 0.12 ± 0.01            | 2.98 ± 0.022         | 2.32 ± 0.030          | 0.777   |
| p.T789P          | No binding             | nd                   | nd                    | nd      |

ka, association rate constant; kd, dissociation rate constant; KD, equilibrium dissociation constant; Kd<sup>app</sup>, apparent dissociation rate constant; nd, not determined.

\*VWF:FVIIIIB determined by ELISA; †VWF:FVIIIIB determined by SPR.

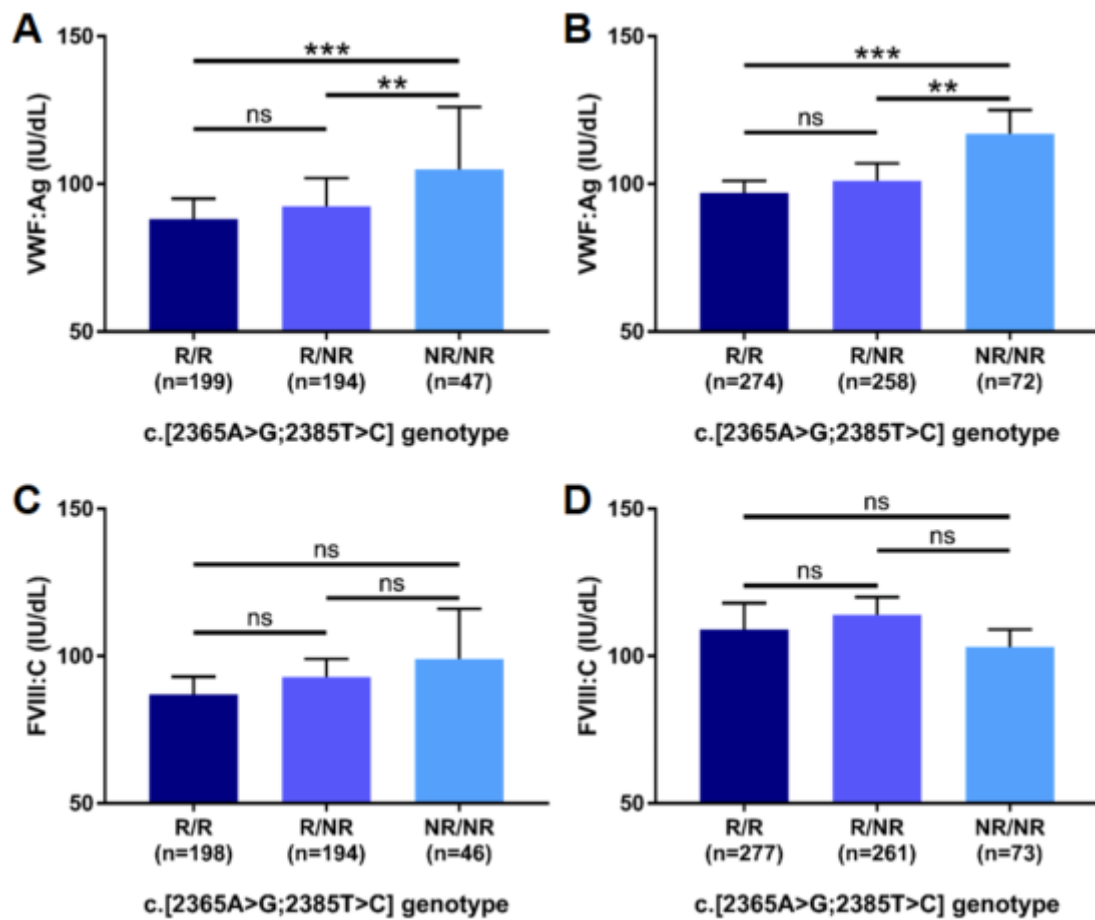

**Figure S1. Association between SNV c.[2365A>G;2385T>C] genotype and median VWF:Ag and FVIII:C levels accounting for ABO blood group. (A) VWF:Ag in O blood group individuals. (B) VWF:Ag in non-O blood group individuals. (C) FVIII:C in O blood group individuals. (D) FVIII:C in non-O blood group individuals. NR, non-reference allele; R, reference allele. Genotypes compared using a Mann-Whitney test (\*\*,  $p < 0.01$ ; \*\*\*,  $p < 0.001$ ; ns, not significant). Bars indicate 95% confidence interval.**

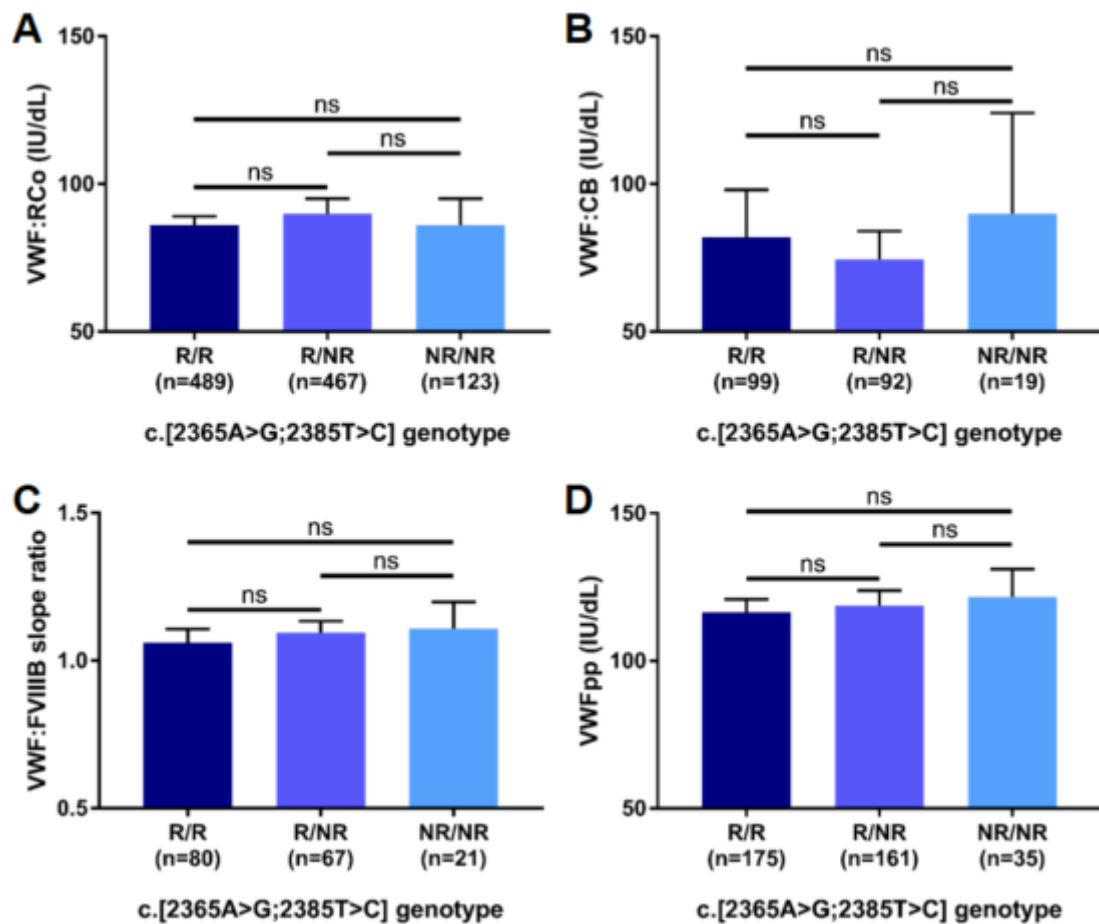

**Figure S2. Association between SNV c.[2365A>G;2385T>C] genotype and VWF activity / propeptide levels in healthy controls.** (A) Median VWF:RCo levels. (B) Median VWF:CB levels. (C) Median VWF:FVIIIb slope ratio. (D) Median VWFpp levels. NR, non-reference allele; R, reference allele. Genotypes compared using a Mann-Whitney test (ns, not significant). Bars indicate 95% confidence interval.

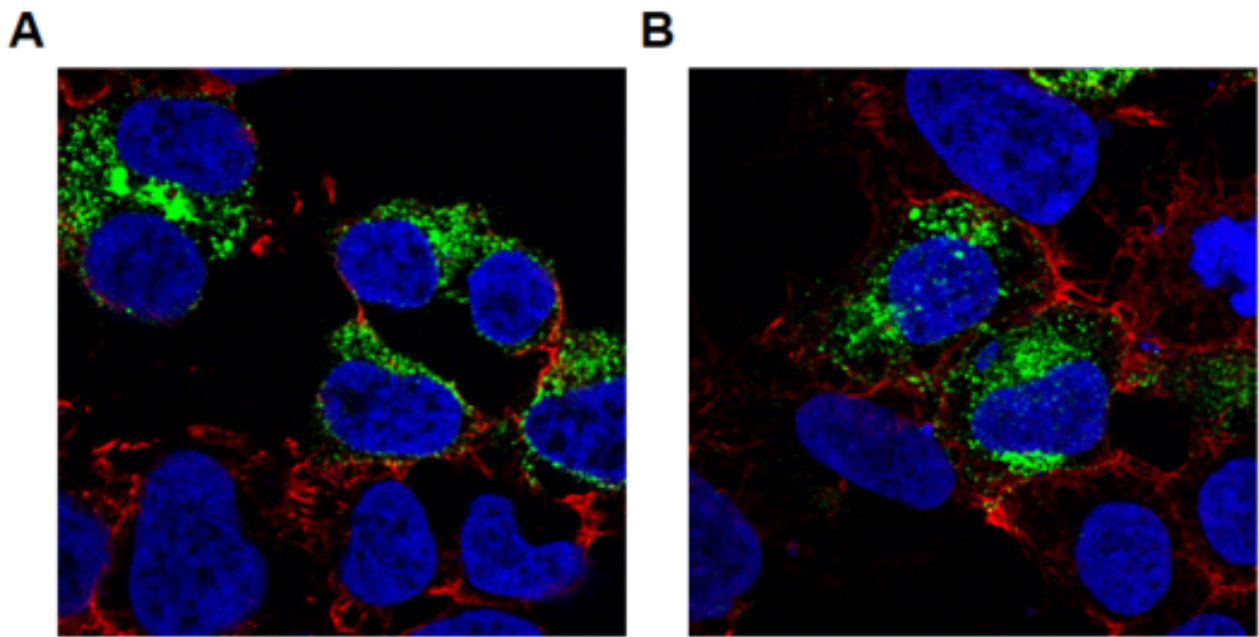

**Figure S3. Intracellular localization and pseudo-Weibel-Palade body formation for wild-type (A) and c.[2365A>G;2385T>C] (B) VWF. Blue, nucleus; green, VWF; red, F-actin.**

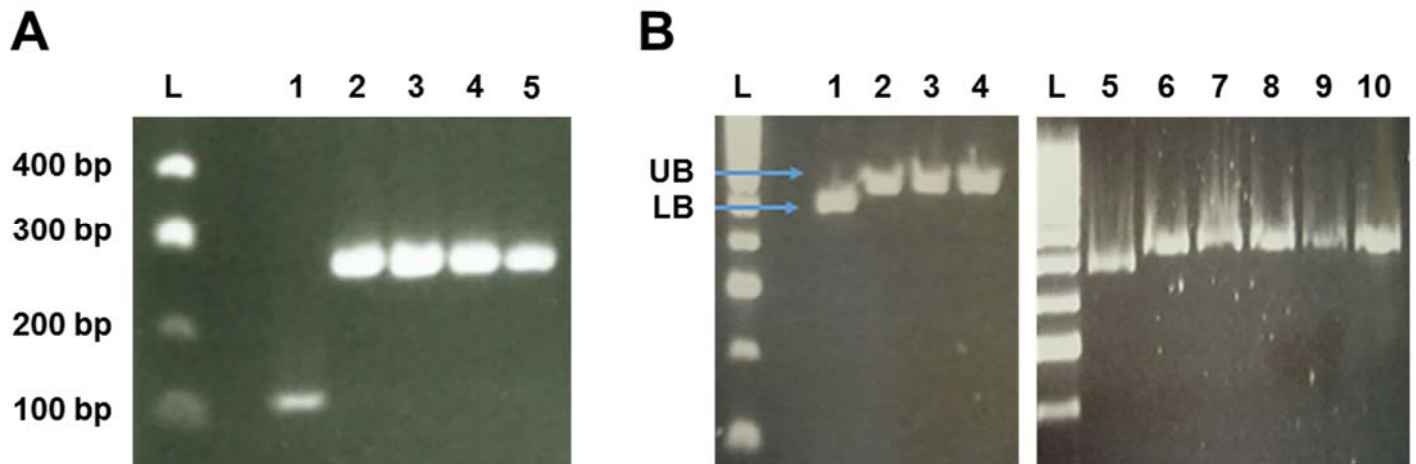

**Figure S4. *In vitro* analysis of SNV effect on splicing.** (A) Influence on acceptor / donor splice sites (lane 1: negative control; lane 2: WT; lane 3: c.2385T>C; lane 4: c.2365A>G; lane 5: c.[2365A>G;2385T>C]). (B) Influence on exonic splice enhancer motifs (lanes 1 and 5: negative control; lanes 2 and 6: positive control; lanes 3, 7 and 9: WT; lane 4: c.2385T>C; lane 8: c.2365A>G; lane 10: c.[2365A>G;2385T>C]). L, HyperLadder 100bp; LB, lower band (i.e. 2 exons); UB, upper band (i.e. 3 exons).



**A**

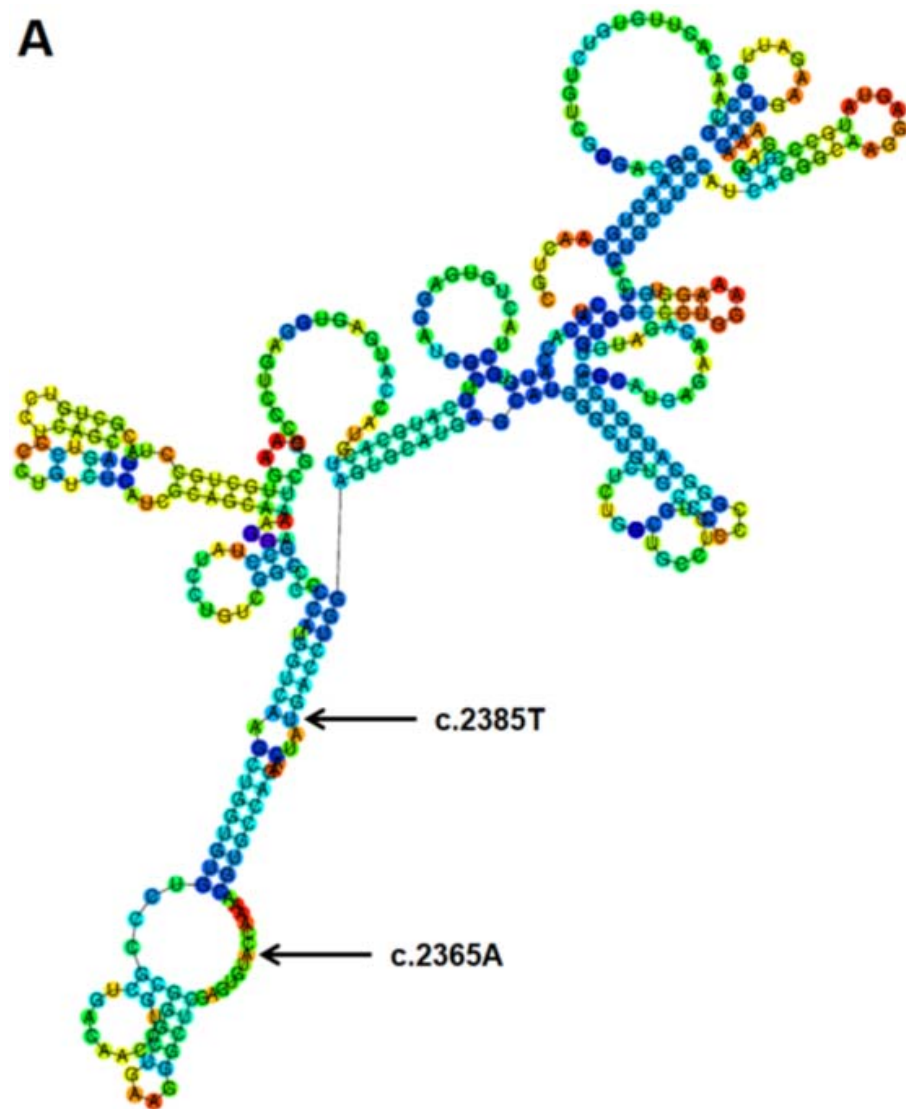

**B**

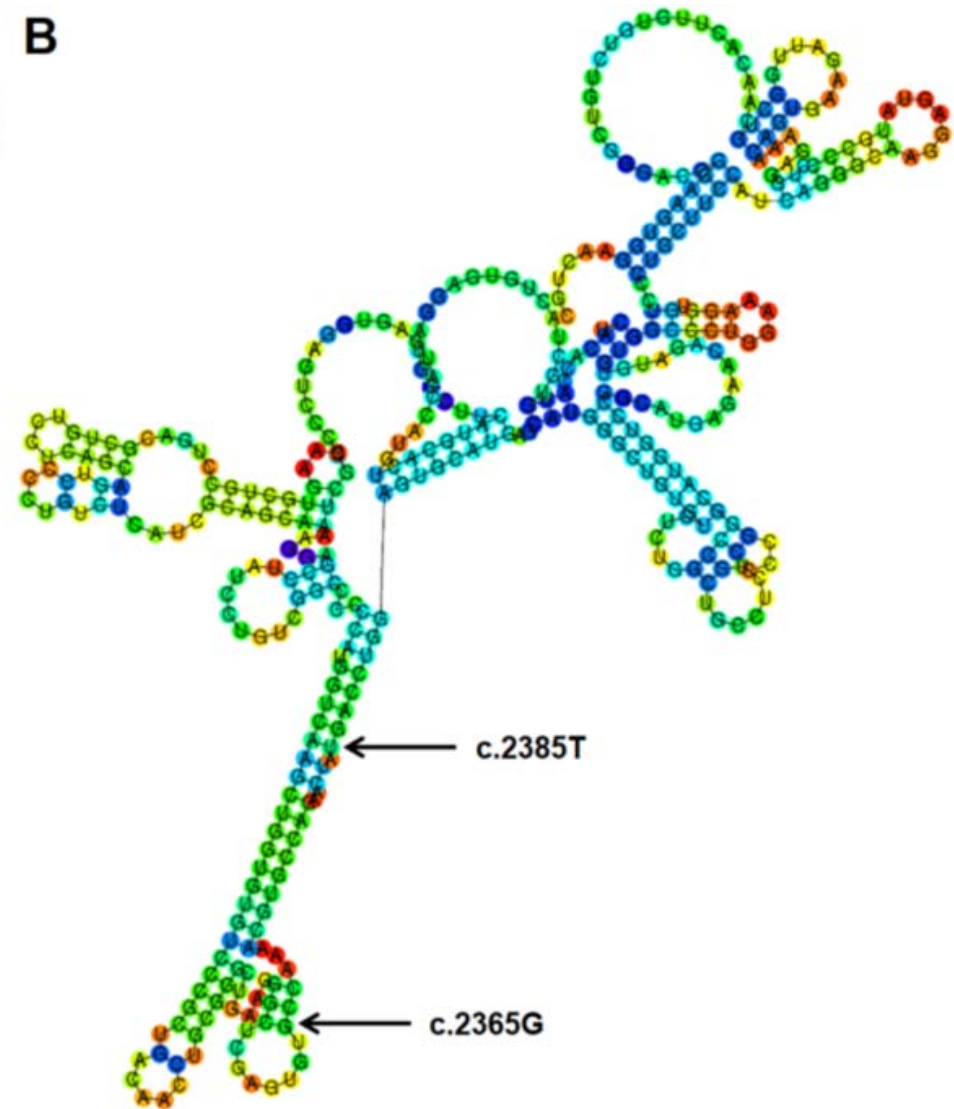

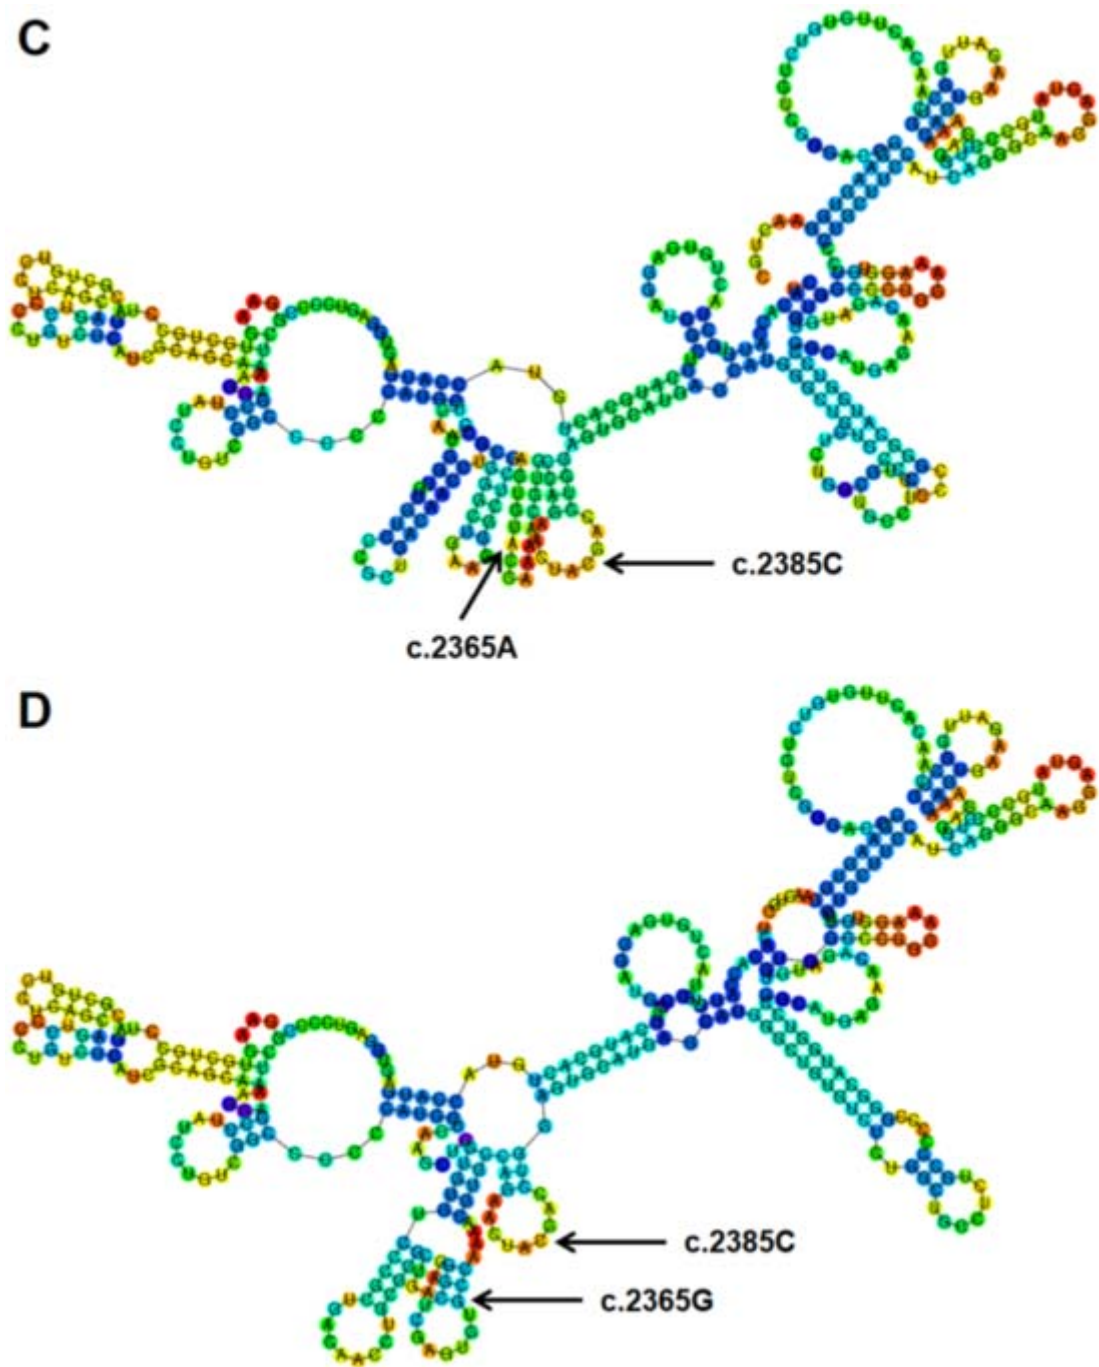

**Figure S5. RNA secondary structure predictions.** (A) Wild-type. (B) c.2365A>G. (C) c.2385T>C. (D) c.[2365A>G;2385T>C]. Data generated with CentroidFold<sup>11</sup> using default settings.

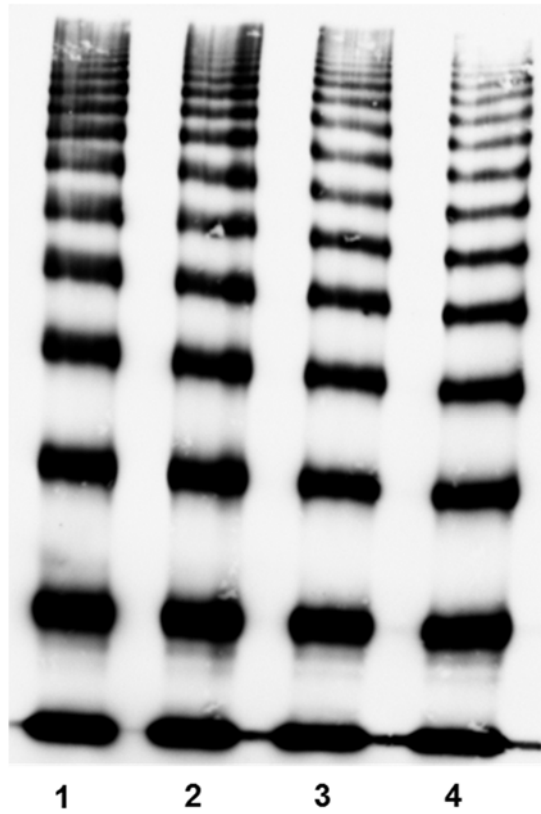

**Figure S6. Multimers profiles of expressed recombinant VWF.** Multimer analysis of secreted VWF was performed via electrophoresis on a 1.6% (w/v) SDS-agarose gel (lane 1: wild-type; lane 2: c.2365A>G; lane 3: c.2385T>C; lane 4: c.[2365A>G;2385T>C]).

## References

1. Tournier I, Vezain M, Martins A, et al. A large fraction of unclassified variants of the mismatch repair genes *MLH1* and *MSH2* is associated with splicing defects. *Hum Mutat.* 2008;29(12):1412-1424.
2. Taylor SL, Bromidge E, Savidge GF, Alhaq A. Evaluation of an automated screening assay for von Willebrand disease type 2N. *Clin Lab Haematol.* 2002;24(6):369-375.
3. Zhukov O, Popov J, Ramos R, et al. Measurement of von Willebrand factor-FVIII binding activity in patients with suspected von Willebrand disease type 2N: application of an ELISA-based assay in a reference laboratory. *Haemophilia.* 2009;15(3):788-796.
4. van den Biggelaar M, Bierings R, Storm G, Voorberg J, Mertens K. Requirements for cellular co-trafficking of factor VIII and von Willebrand factor to Weibel–Palade bodies. *J Thromb Haemost.* 2007;5(11):2235-2242.
5. Dimitrov JD, Christophe OD, Kang J, et al. Thermodynamic analysis of the interaction of factor VIII with von Willebrand factor. *Biochemistry.* 2012;51(20):4108-4116.
6. Schwarz JM, Cooper DN, Schuelke M, Seelow D. MutationTaster2: mutation prediction for the deep-sequencing age. *Nat Methods.* 2014;11(4):361-362.
7. Adzhubei IA, Schmidt S, Peshkin L, et al. A method and server for predicting damaging missense mutations. *Nat Methods.* 2010;7(4):248-249.
8. Niroula A, Urolagin S, Vihinen M. PON-P2: prediction method for fast and reliable identification of harmful variants. *PLoS One.* 2015;10(2):e0117380.
9. Choi Y, Chan AP. PROVEAN web server: a tool to predict the functional effect of amino acid substitutions and indels. *Bioinformatics.* 2015;31(16):2745-2747.
10. Kumar P, Henikoff S, Ng PC. Predicting the effects of coding non-synonymous variants on protein function using the SIFT algorithm. *Nat Protoc.* 2009;4(7):1073-1081.
11. Hamada M, Ono Y, Kiryu H, et al. Rtools: a web server for various secondary structural analyses on single RNA sequences. *Nucleic Acids Res.* 2016;44(Web Server issue):W302-307.
12. Griffiths-Jones S, Saini HK, van Dongen S, Enright AJ. miRBase: tools for microRNA genomics. *Nucleic Acids Res.* 2008;36(Database issue):D154-158.

13. Kozomara A, Griffiths-Jones S. miRBase: integrating microRNA annotation and deep-sequencing data. *Nucleic Acids Res.* 2011;39(Database issue):D152-157.
14. Cartegni L, Wang J, Zhu Z, Zhang MQ, Krainer AR. ESEfinder: a web resource to identify exonic splicing enhancers. *Nucleic Acids Res.* 2003;31(13):3568-3571.
15. Desmet F-O, Hamroun D, Lalande M, Collod-Bérout G, Claustres M, Bérout C. Human Splicing Finder: an online bioinformatics tool to predict splicing signals. *Nucleic Acids Res.* 2009;37(9):e67.
16. Brunak S, Engelbrecht J, Knudsen S. Prediction of human mRNA donor and acceptor sites from the DNA sequence. *J Mol Biol.* 1991;220(1):49-65.
17. Reese MG, Eeckman FH, Kulp D, Haussler D. Improved splice site detection in Genie. *J Comput Biol.* 1997;4(3):311-323.
18. Fairbrother WG, Yeh R-F, Sharp PA, Burge CB. Predictive identification of exonic splicing enhancers in human genes. *Science.* 2002;297(5583):1007-1013.
19. Dogan RI, Getoor L, Wilbur WJ, Mount SM. SplicePort--an interactive splice-site analysis tool. *Nucleic Acids Res.* 2007;35(Web Server issue):W285-291.
